# Supplementary material
Source: PubMed Central journal article supplement (PMC4306503)
Supplement: bc5005526_si_001.pdf [file bc5005526_si_001.pdf]

# SUPPORTING INFORMATION

## **A Cryptophane-Folate Biosensor for $^{129}\text{Xe}$ NMR**

Najat S. Khan, Brittany A. Riggle, Garry K. Seward, Yubin Bai, and Ivan J. Dmochowski\*

Department of Chemistry, University of Pennsylvania  
231 S. 34<sup>th</sup> Street, Philadelphia PA 19104, USA

\*To whom correspondence should be addressed:

E-mail: [ivandmo@sas.upenn.edu](mailto:ivandmo@sas.upenn.edu)

Phone: 215-898-6459

## CONTENTS:

|                                                                                                                                                          |    |
|----------------------------------------------------------------------------------------------------------------------------------------------------------|----|
| <b>Scheme S1:</b> 3-step synthesis of cyclotriguaiacylene (CTG) .....                                                                                    | S3 |
| <b>Scheme S2:</b> Synthesis of [3-propargyloxy-4-(2-iodoethoxy)phenyl]methanol (D-linker) and [4-(2-iodoethoxy)-3-methoxyphenyl]methanol (A-linker)..... | S3 |
| <b>Scheme S3:</b> Final 3 steps in synthesis of monopropargyl derivative of cryptophane-A.....                                                           | S3 |
| <b>Figure S1:</b> <sup>1</sup> H NMR spectrum of folate recognition moiety <b>7</b> .....                                                                | S4 |
| <b>Figure S2:</b> <sup>13</sup> C NMR spectrum of folate recognition moiety <b>7</b> .....                                                               | S4 |
| <b>Figure S3:</b> HPLC purification trace for azido-peptide <b>22</b> .....                                                                              | S5 |
| <b>Figure S4:</b> MALDI-MS for azido-peptide <b>22</b> .....                                                                                             | S5 |
| <b>Figure S5:</b> HPLC purification trace for peptide-folate conjugate <b>23</b> .....                                                                   | S6 |
| <b>Figure S6:</b> MALDI-MS for purified peptide-folate conjugate <b>23</b> .....                                                                         | S6 |
| <b>Figure S7:</b> HPLC trace for peptide-folate-conjugate <b>24</b> .....                                                                                | S7 |
| <b>Figure S8:</b> MALDI-MS for purified peptide-folate-cryptophane conjugate <b>24</b> .....                                                             | S7 |
| <b>Figure S9:</b> HPLC traces for Cy3-labeled peptide-folate-cryptophane <b>25</b> .....                                                                 | S8 |
| <b>Figure S10:</b> MALDI-MS for purified Cy3-labeled peptide-folate-cryptophane <b>25</b> .....                                                          | S8 |
| <b>Figure S11:</b> Hyperpolarized <sup>129</sup> Xe NMR of 60 μM <b>24</b> and 30 μM folate binding protein.....                                         | S9 |
| <b>Cited Reference</b> .....                                                                                                                             | S9 |

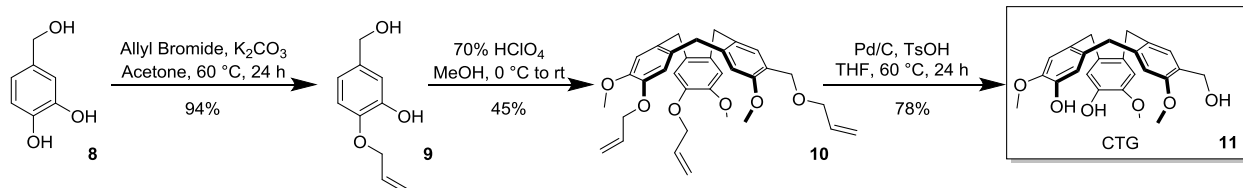

**Scheme S1:** 3-step synthesis of cyclotriguaiacylene (CTG). Figure adapted from Wei *et al.*<sup>1</sup>

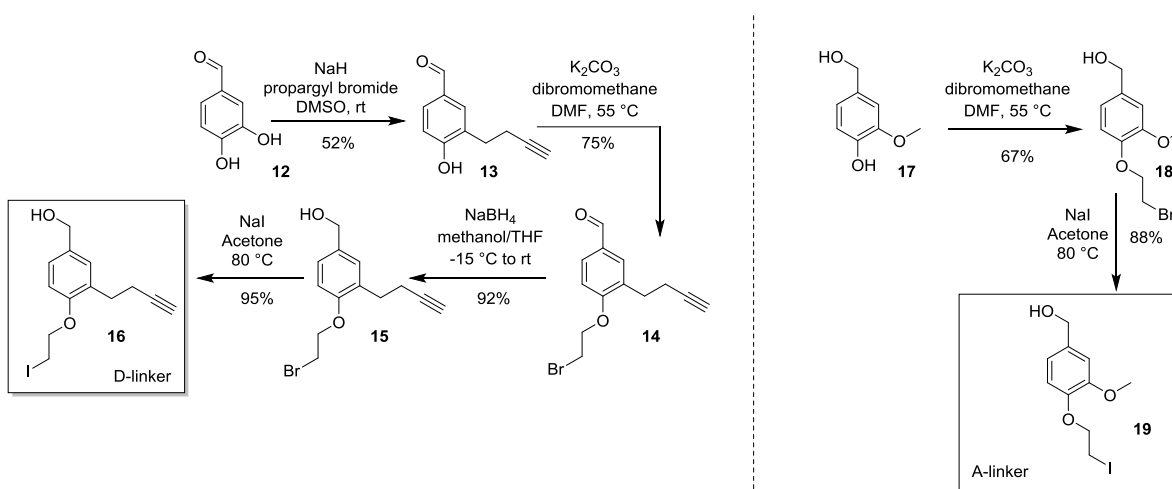

**Scheme S2:** Synthesis of [3-propargyloxy-4-(2-iodoethoxy)phenyl]methanol (D-linker) and [4-(2-iodoethoxy)-3-methoxyphenyl]methanol (A-linker). Figure adapted from Wei *et al.*<sup>1</sup>

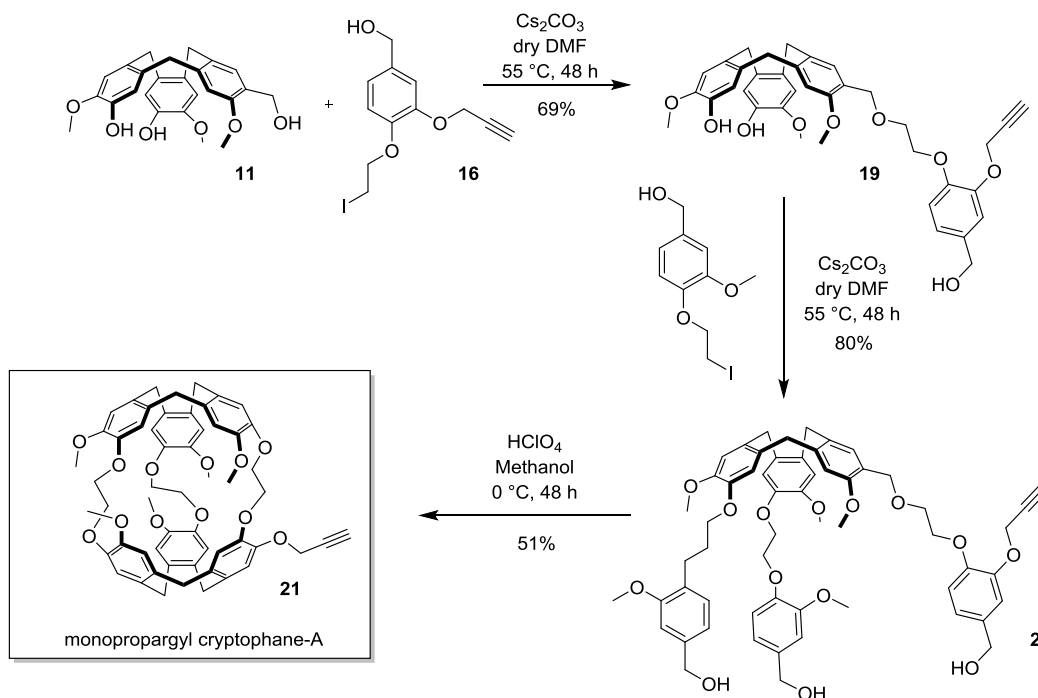

**Scheme S3:** Final 3 steps in synthesis of monopropargyl derivative of cryptophane-A. Figure adapted from Wei *et al.*<sup>1</sup>

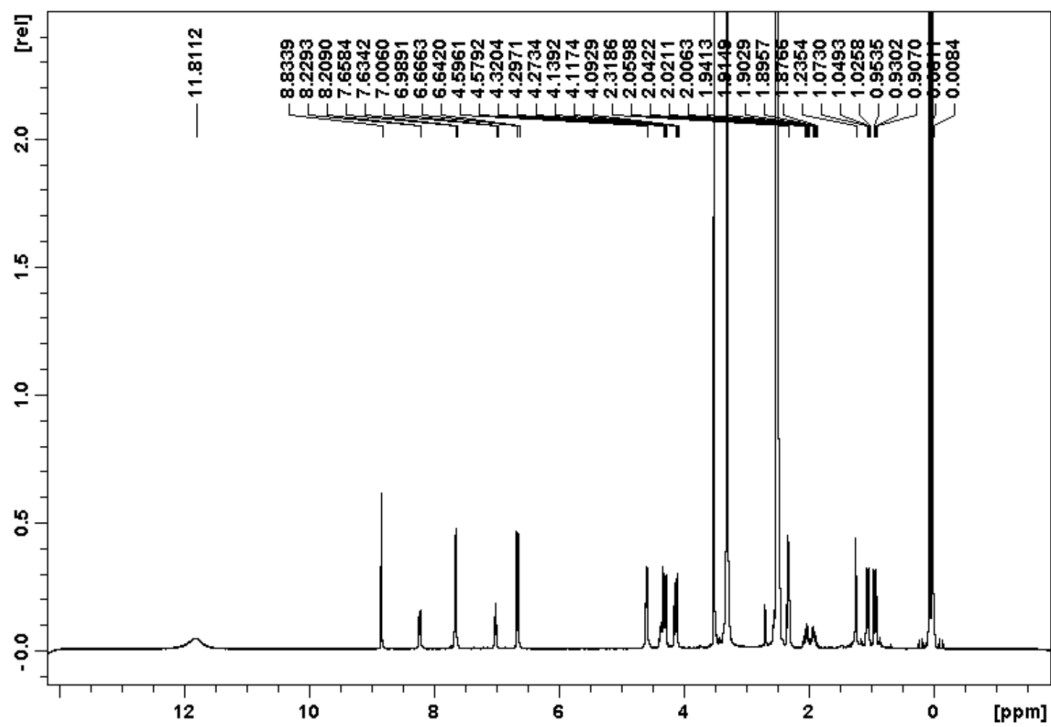

**Figure S1:**  $^1\text{H}$  NMR spectrum of folate recognition moiety **7** in  $\text{DMSO-d}_6$  at 298 K.

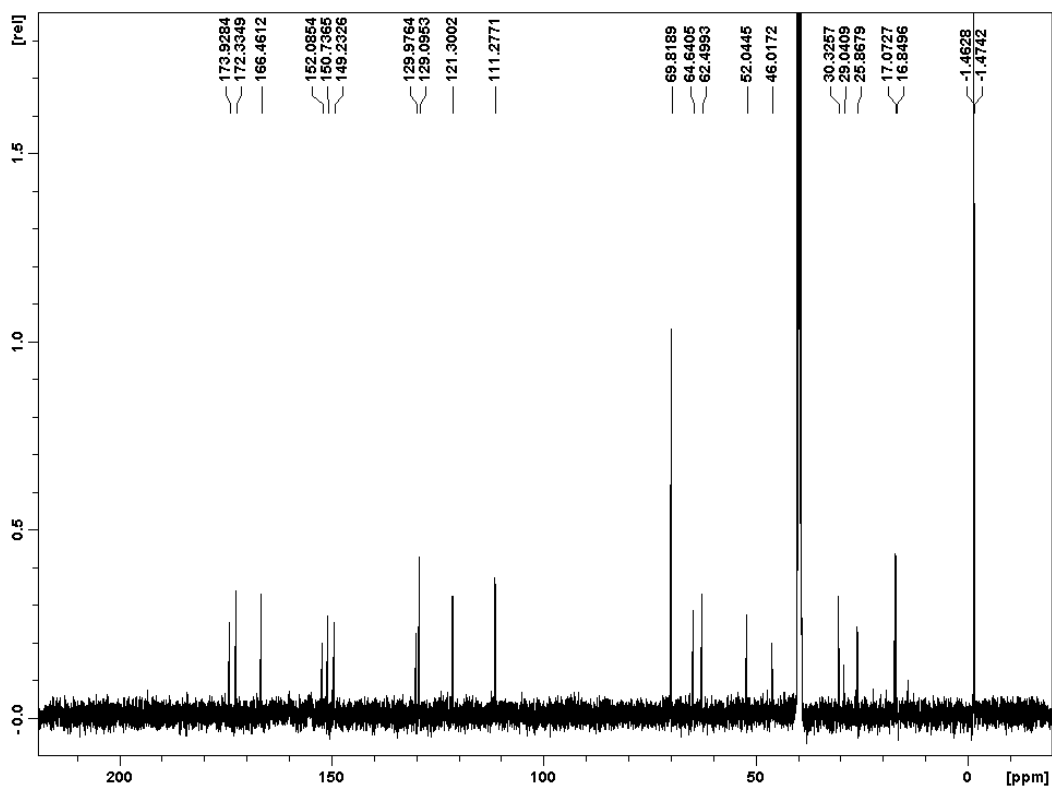

**Figure S2:**  $^{13}\text{C}$  NMR spectrum of folate recognition moiety **7** in  $\text{DMSO-d}_6$  at 298 K.

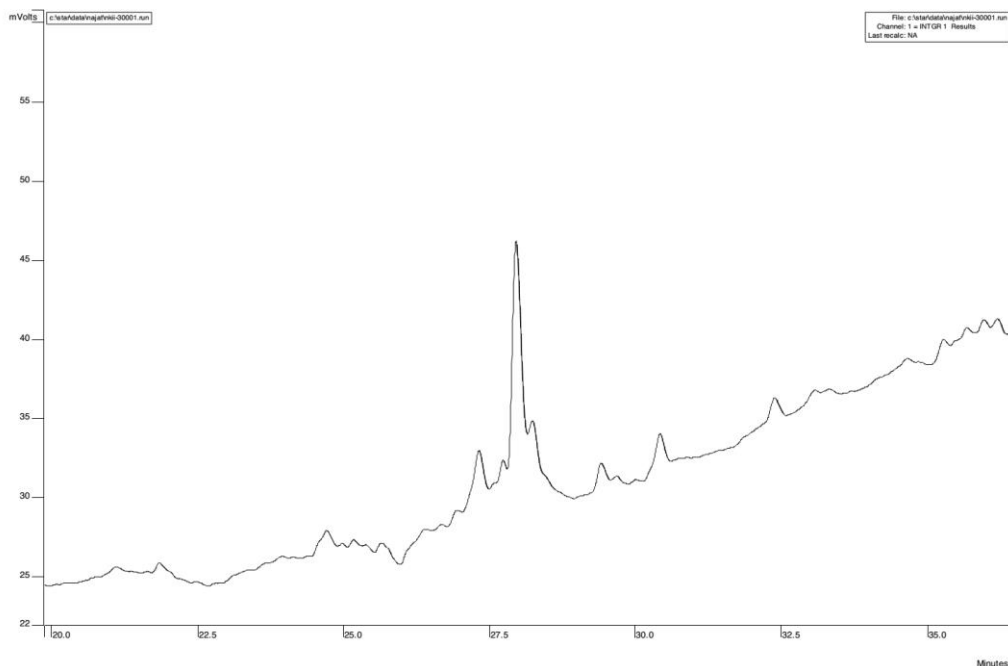

**Figure S3:** HPLC purification trace for azido-peptide **22**.

Semi-preparative HPLC purification of **22** was accomplished using RP-HPLC with 0.1% TFA in ddH<sub>2</sub>O (A) and 0.1% TFA in HPLC-grade acetonitrile (B) using a gradient method and monitoring at 280 nm. Time 0 to 45 min, A/B = 95/5 to 50/50; 45 to 57 min, A/B = 50/50 to 20/80. Retention time: 27.96 min.

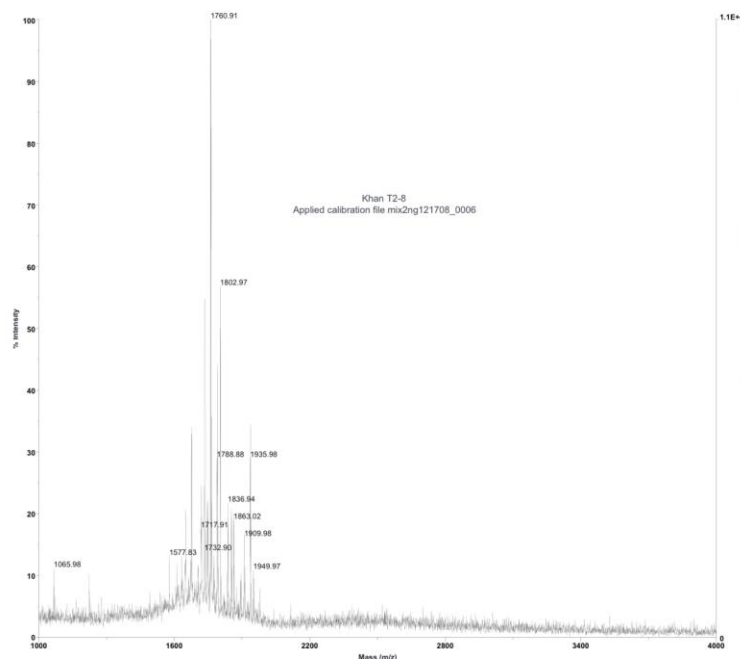

**Figure S4:** MALDI-MS for azido-peptide **22** from microcleavage and analytical HPLC. C<sub>72</sub>H<sub>141</sub>N<sub>31</sub>O<sub>16</sub>S<sub>2</sub> (M + H<sup>+</sup>) 1761.06; found 1760.91. Note, laser power was attenuated to mitigate photodissociation of the azide.

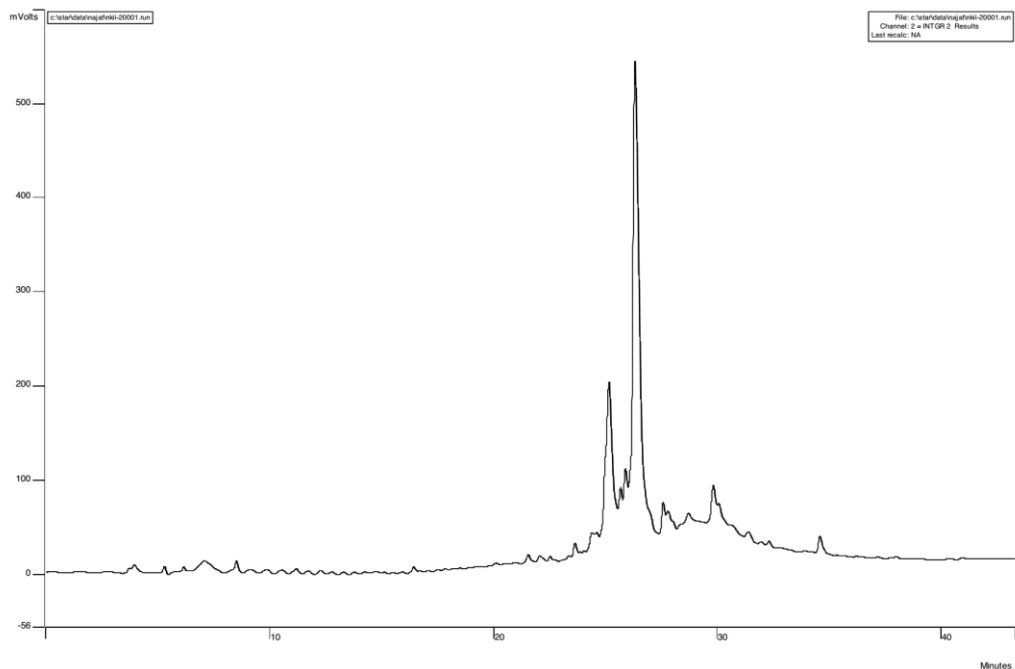

**Figure S5:** HPLC purification trace for peptide-folate conjugate **23**.

Semi-preparative HPLC purification of **23** was accomplished using RP-HPLC with 0.1% TFA in ddH<sub>2</sub>O (A) and 0.1% TFA in HPLC-grade acetonitrile (B) using a gradient method and monitoring at 280 nm. Time 0 to 45 min, A/B = 95/5 to 50/50; 45 to 57 min, A/B = 50/50 to 20/80. Retention time: 26.31 min.

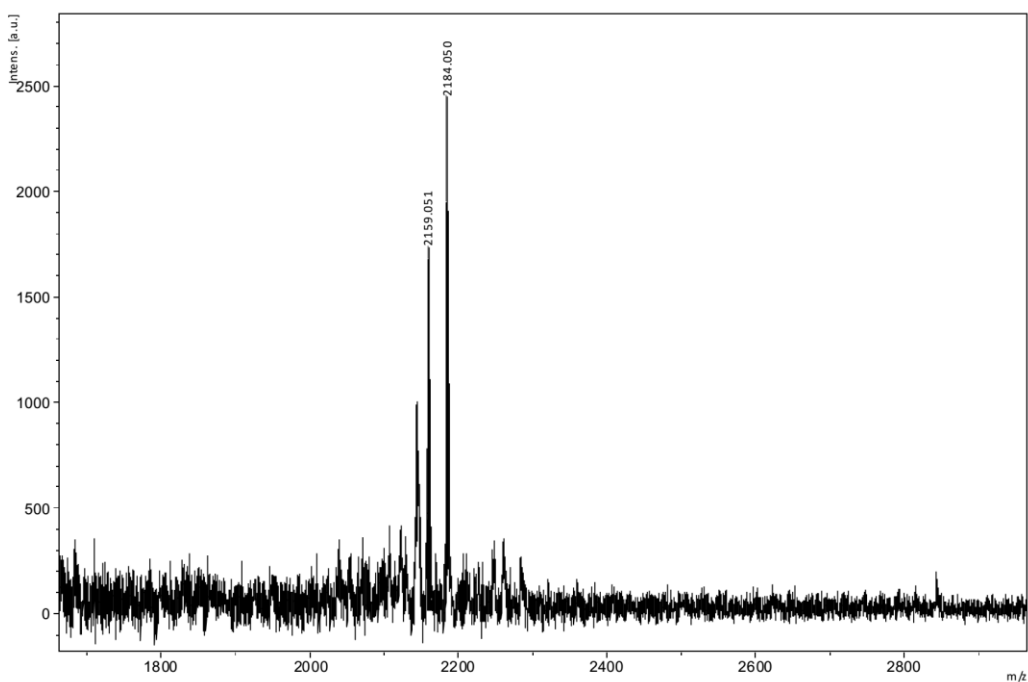

**Figure S6:** MALDI-MS for purified peptide-folate conjugate **23**. C<sub>91</sub>H<sub>158</sub>N<sub>38</sub>O<sub>21</sub>S<sub>2</sub> (M + H<sup>+</sup>) 2184.19; found 2184.05

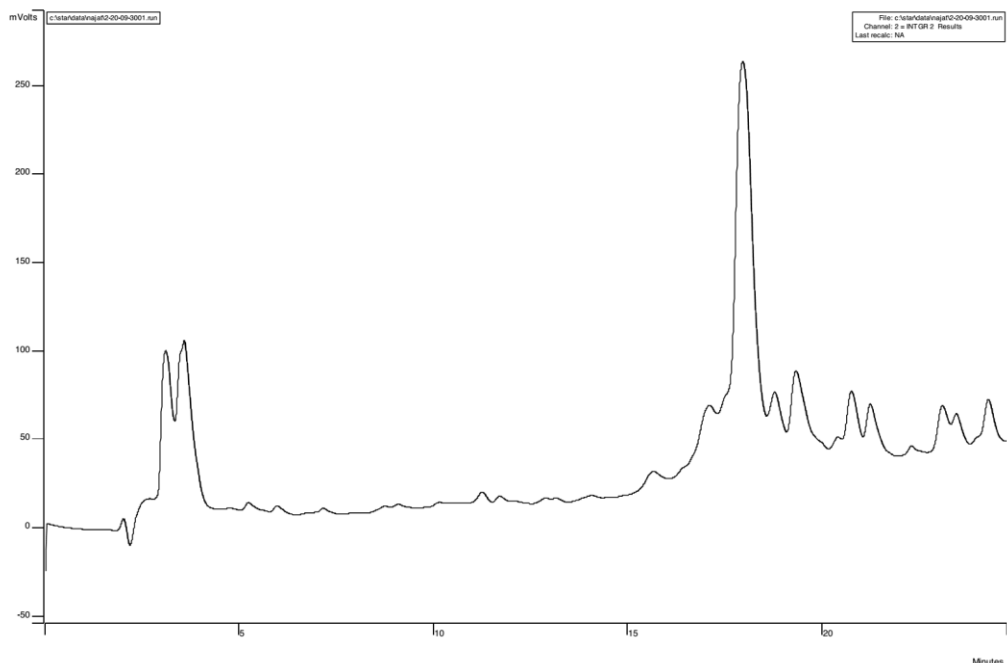

**Figure S7:** HPLC trace for peptide-folate-conjugate **24**.

Semi-preparative HPLC purification of **24** was accomplished using RP-HPLC with 0.1% TFA in ddH<sub>2</sub>O (A) and 0.1% TFA in HPLC-grade acetonitrile (B) using a gradient method and monitoring at 280 nm. Time 0 to 65 min, A/B = 95/5 to 30/70; 65 to 68 min, A/B = 30/70 to 20/80. Retention time: 18.73 min.

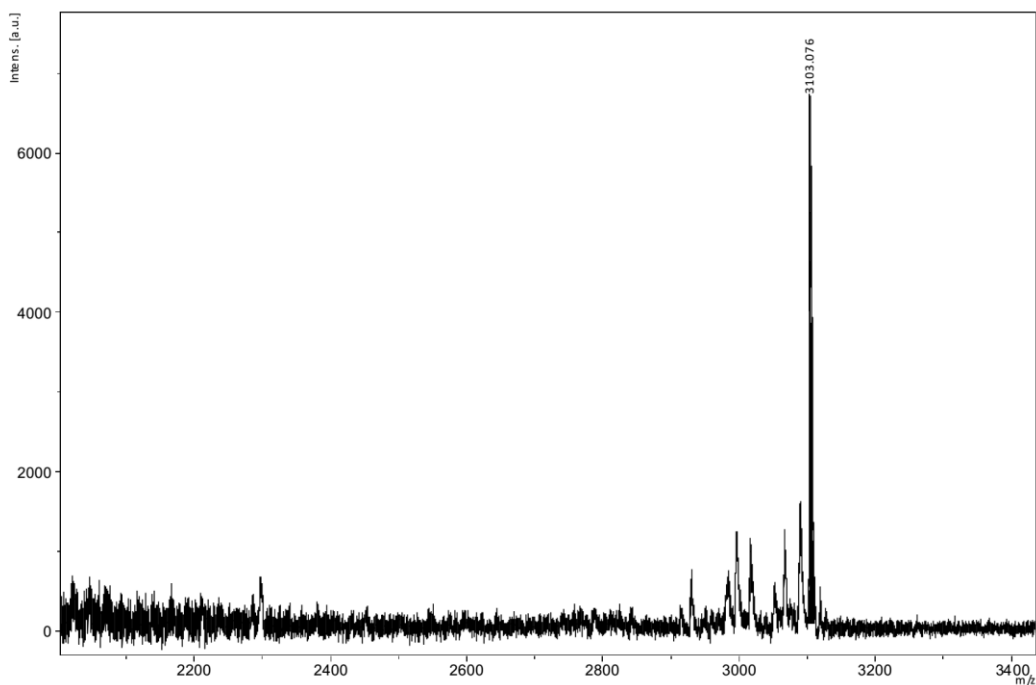

**Figure S8:** MALDI-MS for purified peptide-folate-cryptophane conjugate **24**. C<sub>147</sub>H<sub>211</sub>N<sub>38</sub>O<sub>32</sub>S<sub>2</sub> (M + H<sup>+</sup>) 3102.61; found 3103.08

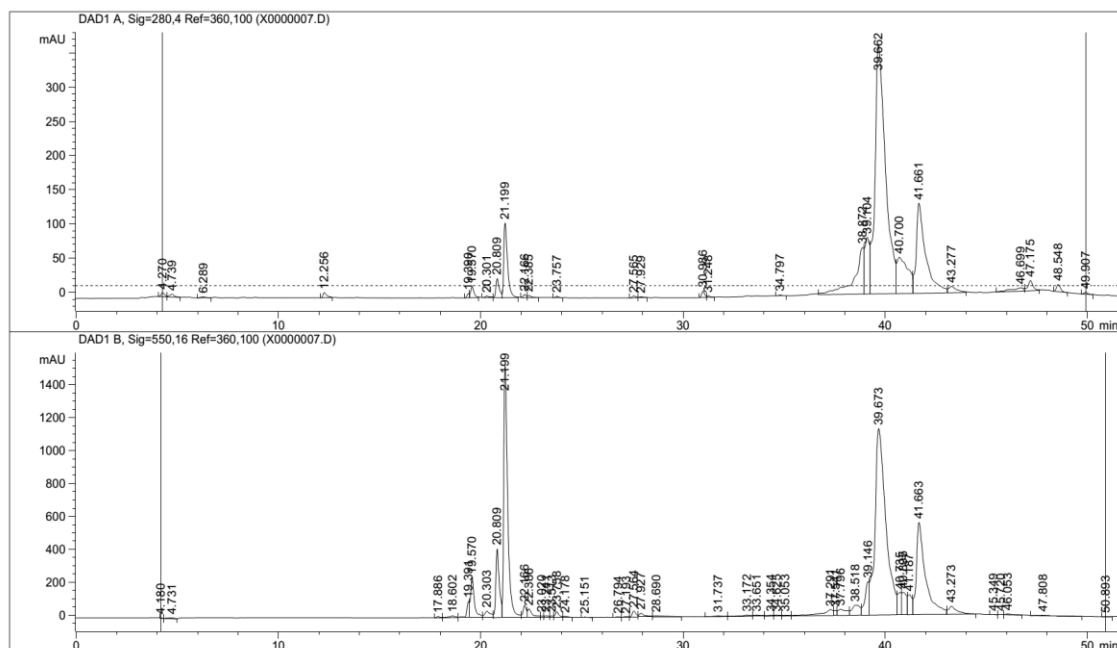

**Figure S9:** HPLC traces for Cy3-labeled peptide-folate-cryptophane conjugate **25**, monitored at 280 nm (above) and 550 nm (below).

Semi-preparative HPLC purification of **24** was accomplished using RP-HPLC with 0.1% TFA in ddH<sub>2</sub>O (A) and 0.1% TFA in HPLC-grade acetonitrile (B) using a gradient method and monitoring at 280 and 550 nm. Time 0 to 65 min, A/B = 95/5 to 30/70; 65 to 68 min, A/B = 30/70 to 20/80. Retention time: 39.67 min.

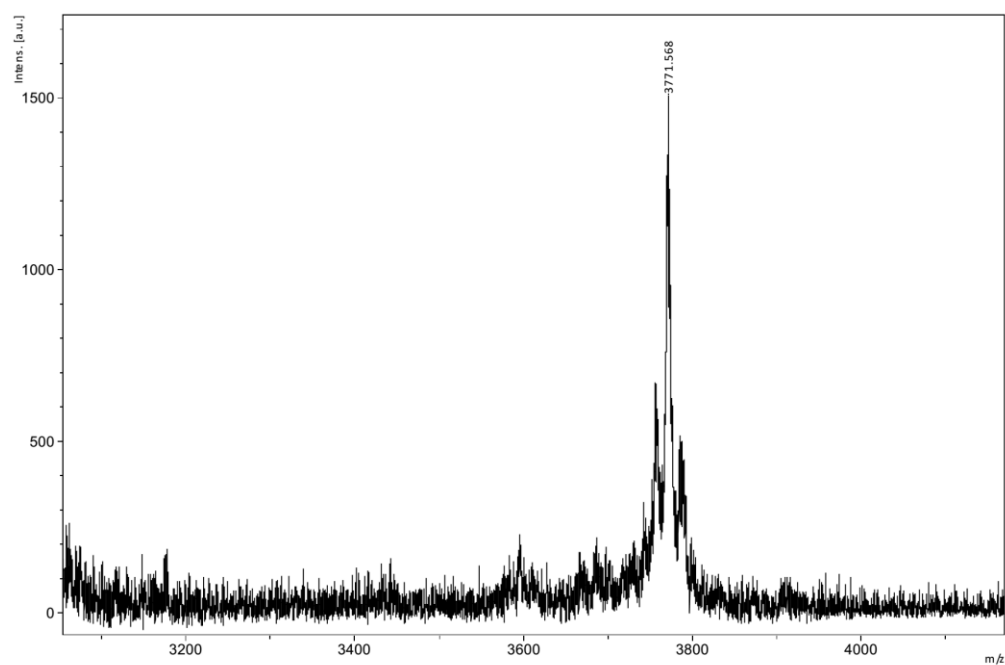

**Figure S10:** MALDI-MS for purified Cy3-labeled peptide-folate-cryptophane **25**.  
 $C_{180}H_{253}N_{42}O_{42}S_3$  (Cy3-I) ( $M+H^+$ ) 3771.81; found 3771.59



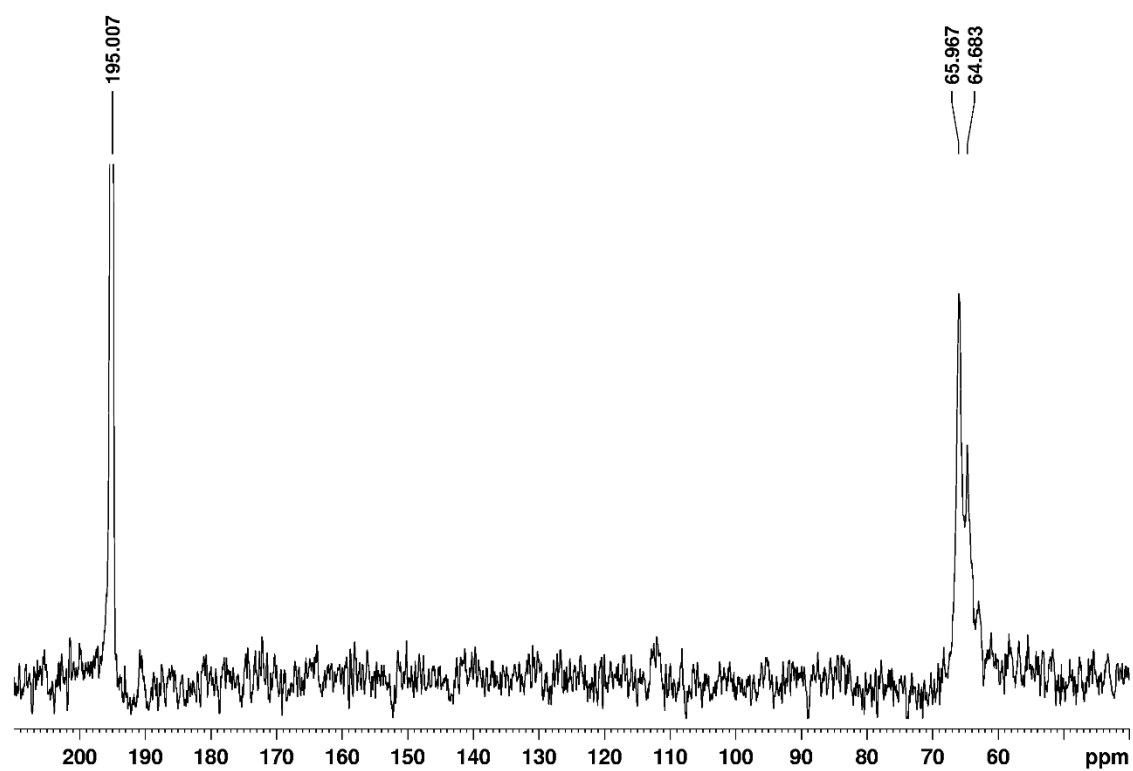

**Figure S11:** Hyperpolarized  $^{129}\text{Xe}$  NMR spectrum of 60  $\mu\text{M}$  biosensor **24** and 30  $\mu\text{M}$  folate binding protein in acetate buffer at pH 5.0 (40 scans; S/N = 30:1 with 50 Hz line broadening).

### Cited Reference

- (1) Wei, Q.; Seward, G. K.; Hill, P. A.; Patton, B.; Dimitrov, I. E.; Kuzma, N. N.; Dmochowski, I. J., (2006) Designing  $^{129}\text{Xe}$  NMR biosensors for matrix metalloproteinase detection. *J. Am. Chem. Soc.* 128 (40), 13274-13283.
